## SHORT COMMUNICATION

# Differences in molecular mechanisms of K<sup>+</sup> clearance in the auditory sensory epithelium of birds and mammals

Viviane Wilms<sup>1</sup>, Chris Söffgen<sup>1</sup> and Hans Gerd Nothwang<sup>1,2,\*</sup>

## ABSTRACT

Mechanoelectrical transduction in the vertebrate inner ear is a highly conserved mechanism that is dependent on K<sup>+</sup> influx into hair cells. Here, we investigated the molecular underpinnings of subsequent K<sup>+</sup> recycling in the chicken basilar papilla and compared them with those in the mammalian auditory sensory epithelium. As in mammals, the avian auditory hair cell uses KCNQ4, KCNMA1 and KCNMB1 in its K<sup>+</sup> efflux system. Expression of *KCNQ1* and *KCNE1* suggests an additional efflux apparatus in avian hair cells. Marked differences were observed for K<sup>+</sup> clearance. In mammals, KCC3, KCC4, Kir4.1 and CLC-K are present in supporting cells. Of these, only *CLC-K* is expressed in avian supporting cells. Instead, they possess NKCC1 to move K<sup>+</sup> across the membrane. This expression pattern suggests an avian clearance mechanism reminiscent of the well-established K<sup>+</sup> uptake apparatus present in inner ear secretory cells. Altogether, tetrapod hair cells show similar mechanisms and supporting cells show distinct molecular underpinnings of K<sup>+</sup> recycling.

**KEY WORDS:** Mechanotransduction, Avian, Evolution, Inner ear, Potassium, Slc12

## INTRODUCTION

K<sup>+</sup> is the major charge ion in the vertebrate inner ear. Its apical influx into hair cells initiates mechanotransduction in both the auditory and vestibular system (Wangemann, 2002; Hibino and Kurachi, 2006). The influx is based on a high K<sup>+</sup> concentration in the endolymph of the scala media (Johnstone et al., 1963). Despite these conserved features, marked differences in detail exist across vertebrates such as the extent of the positive endocochlear potential in the endolymph. In therian mammals, it is typically +80 to +90 mV (Schmidt and Fernandez, 1962; Wangemann, 2006), and may even exceed +120 mV (Steel et al., 1987), whereas in birds it is normally +10 to +20 mV (Poje et al., 1995; Schmidt, 1963; Wilms et al., 2016), with the barn owl at the upper limit with +34 mV (Wilms et al., 2016), and in reptiles it is +2 to +7 mV (Schmidt and Fernandez, 1962). This difference is paralleled by a different organization of the secretory epithelia generating the endolymph. In mammals, the stria vascularis is situated in the lateral wall and consists of multiple layers of highly specialized cells (Hibino et al., 2010), whereas in birds, the secretory epithelium is single layered

and overlies the basilar papilla (BP) and separates the scala media and scala vestibuli (Ishiyama et al., 1970).

Gene expression analysis of the secretory epithelia in mouse and chicken revealed a strong conservation of the molecular machinery for K<sup>+</sup> secretion into the endolymph (Wilms et al., 2016). Nine out of 11 genes were expressed in both tissues. K<sup>+</sup>, however, must be not only secreted into the endolymph but also effluxed from hair cells, cleared from their extracellular space and then recycled to the stria vascularis (Mistrik and Ashmore, 2009; Hibino and Kurachi, 2006; Zdebik et al., 2009). Molecular and genetic analyses over the last two decades have identified many key players in the mammalian organ of Corti. K<sup>+</sup> efflux from hair cells is mediated by activation of voltage-gated KCNQ4 channels (Kubisch et al., 1999) and Ca<sup>2+</sup>-activated K<sup>+</sup> BK channels (Lewis and Hudspeth, 1983; Navaratnam et al., 1997; Rosenblatt et al., 1997). They release K<sup>+</sup> into the extracellular space, where it is removed in order not to continuously depolarize hair cells (Mistik and Ashmore, 2009; Hibino and Kurachi, 2006; Zdebik et al., 2009). Several pathways have been proposed that may act in parallel to achieve this clearance (Zdebik et al., 2009). Current measurements suggest that some K<sup>+</sup> diffuses extracellularly through the tunnel of Corti to reach the open perilymph space of the scala tympani (Zidanic and Brownell, 1990; Johnstone et al., 1989). Additionally, K<sup>+</sup> may be taken up by neighboring supporting cells such as Deiters' cells and Claudius' cells. K<sup>+</sup> is then passed through an epithelial tissue gap junction system coupling supporting cells to be relayed to the stria vascularis. This pathway is based on genetic analysis. Deiters' cells express the potassium chloride co-transporters KCC3 (Boettger et al., 2003) and KCC4 (Boettger et al., 2002) and the inwardly rectifying K<sup>+</sup> channel Kir4.1 (Hibino et al., 1997). Mutations in any of the three genes cause deafness. The precise (patho-) mechanisms, however, have still to be elucidated (Hibino et al., 2004; Zdebik et al., 2009), as KCC3 (Boettger et al., 2003) and Kir4.1 (Hibino et al., 2004) are also expressed in other areas of the cochlea. Further recycling of K<sup>+</sup> to the stria vascularis might then occur via an epithelial cell gap junction system (Kikuchi et al., 2000) involving connexins 26 and 30 (Kikuchi et al., 1994; Lautermann et al., 1998).

In chicks, connexins 26 and 30 were shown to be expressed in supporting cells of the basilar papilla. In contrast, birds have lost the gene *Slc12a6* encoding KCC3 and amphibians and lizards are devoid of *Slc12a7* encoding KCC4 (Gagnon and Delpire, 2013; Hartmann et al., 2014), suggesting differences in the K<sup>+</sup> circulation system in tetrapod inner ears. To clarify this issue, we examined the expression of avian orthologs of the mammalian toolkit.

## MATERIALS AND METHODS

### Animals

Chickens, *Gallus gallus domesticus* (Linnaeus 1758), egg-layer breed, aged 12–17 days post-hatching were used. All protocols were in accordance with the German Animal Protection law and were approved by local animal care and use committees (Laves,

<sup>1</sup>Neurogenetics group, Cluster of Excellence "Hearing4All", School of Medicine and Health Sciences, Carl von Ossietzky University Oldenburg, Oldenburg 26111, Germany. <sup>2</sup>Research Center for Neurosensory Sciences, Carl von Ossietzky University Oldenburg, Oldenburg 26111, Germany.

\*Author for correspondence (hans.g.nothwang@uni-oldenburg.de)

 H.G.N., 0000-0001-7695-6437

Oldenburg, Germany). Protocols also followed the NIH guide for the care and use of laboratory animals.

### Tissue fixation

Animals were injected with a lethal dose of sodium pentobarbital (Narkodorm, CP-Pharma GmbH, Burgdorf, Germany) and perfused transcardially with phosphate-buffered saline (PBS) containing (mmol l<sup>-1</sup>): 130 NaCl, 7 Na<sub>2</sub>HPO<sub>4</sub> and 3 NaH<sub>2</sub>PO<sub>4</sub>, pH 7.4, followed by fixation by 4% paraformaldehyde (PFA) in PBS. Animals were then decapitated and the head was stored in PFA at 4°C overnight. For dissection of the cochlea, the middle ear cavity was opened and bony structures were removed.

### RNA isolation and reverse transcription

Total RNA was isolated from the brain and kidney by the guanidine thiocyanate method (Chomczynski and Sacchi, 1987). Reverse transcription of total RNA (10 µg) was performed using standard

protocols as described previously (Nothwang et al., 2001; Wilms et al., 2016).

### RNA *in situ* hybridization

Probes for *ATP1A1*, *ATP1A2*, *ATP1A3*, *ATP1B2*, *KCNJ10*, *KCNJ16*, *KCNMA1*, *KCNMB1*, *KCNQ1*, *KCNQ4*, *KCNE1*, *SLC12A2* and *SLC12A7* were generated from brain cDNA, and probes for *BSND* and *CLCK* were generated from kidney cDNA. Primers are given in Table S1. PCR products were cloned and transcribed by T7 or SP6 polymerases in the presence of digoxigenin-11-UTP (Roche, Mannheim, Germany) (Ehmann et al., 2013) to yield antisense and sense probes, respectively.

Cochleae were cryoprotected in 15% or 30% sucrose in PBS for ≥30 min. They were then cut into two pieces harboring approximately linear segments of basilar papilla each. The pieces were transferred to custom-made molds filled with TissueTek (VWR, Darmstadt, Germany), oriented for later cross-sectioning, and rapidly frozen on a metal platform cooled by liquid nitrogen. Cross-sections of 20 µm thickness were cut on a cryostat (HM 400, Microm, Waldorf, Germany or CM1950, Leica Biosystems) and sections were stored at -80°C until use. On-slide *in situ* hybridization was performed at 50–60°C overnight in hybridization buffer [50% formamide, 5× SSC, 2% blocker (Roche), 0.02% SDS, 0.1% *N*-lauryl sarcosine; Wilms et al., 2016; Pawlik et al., 2016]. Bound probes were detected with an anti-digoxigenin antibody conjugated to alkaline phosphatase (Roche). SP6 (sense) probes served as negative controls and yielded no staining. Slides were documented using DIC optics on a Nikon Eclipse 90i microscope with a digital camera attached.

### Immunohistochemistry

Cochlea sections were mounted on Superfrost Plus microscope slides (Thermo Fisher Scientific, Waltham, MA, USA), dried and subsequently immunoreacted according to standard protocols, using 3% bovine serum albumin+0.2% Triton X-100 as blocking solution. The primary antibody anti-Na<sup>+</sup>/K<sup>+</sup>-ATPase (A276, Sigma-Aldrich, Darmstadt, Germany) was applied at a concentration of 1:4000, followed by a secondary anti-mouse antibody (1:1000; Invitrogen, Carlsbad, CA, USA), coupled to Alexa Fluor 488. Control slides were treated in parallel, omitting the primary antibody. Finally, slides were coverslipped with Mowiol and documented using a TCS SP8 confocal laser scanning microscope (Leica, Wetzlar, Germany).

### RESULTS AND DISCUSSION

To investigate the molecular basis of K<sup>+</sup> cycling in the avian basilar papilla, we characterized in the chicken the expression pattern of genes suggested to be involved in K<sup>+</sup> cycling in the auditory sensory epithelium of mammals: *KCNJ10*, *KCNQ4*, *KCNMA1* and *KCNMB1* encoding the K<sup>+</sup> channels K<sub>ir</sub>4.1 and K<sub>v</sub>7.4 and the Ca<sup>2+</sup>-activated K<sup>+</sup> channel subunits α1 and β1, respectively, and *SLC12A7*, encoding KCC4. We also studied *CLC-K*, encoding a Cl<sup>-</sup> channel, which is expressed in mature Deiters' cells. Note that the chicken genome has only one *CLC-K* gene, unlike mammals, which harbor two paralog genes in their genome (Wilms et al., 2016). Finally, we included several genes previously probed in the tegmentum vasculosum (Wilms et al., 2016), as some of them were apparently expressed in the basilar papilla. This set of genes comprised *ATP1A1*, *ATP1B1*, *ATP1A2*, *ATP1A3*, *ATP1B1*, *BSND*, *KCNJ16*, *KCNQ1*, *KCNE1* and *SLC12A2*. To study their expression, RNA *in situ* hybridization with digoxigenin-labeled antisense probes was performed on cross-sections of the cochlea

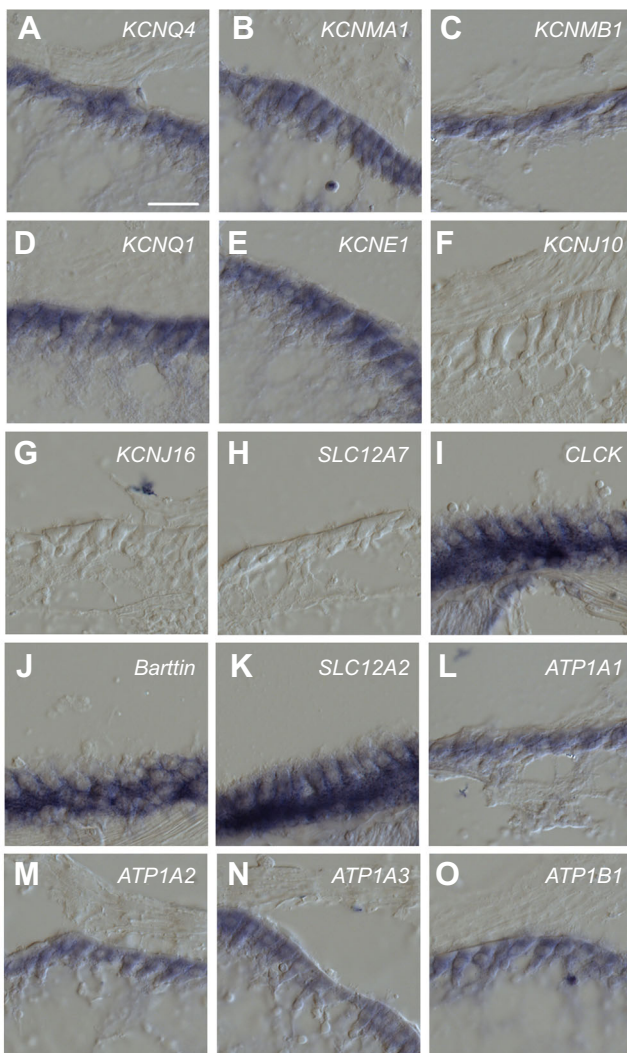

**Fig. 1. RNA *in situ* hybridization on chicken basilar papilla.** Cochlea cross-sections were hybridized with digoxigenin-labeled cRNA probes, as indicated in the images. Most probes led to a signal in the hair cells of the basilar papilla (A–E, I–O). Only hybridization with *KCNJ10*, *KCNJ16* and *SLC12A7* probes showed no signal, even after prolonged staining (F–H). Functionality of probes was shown previously (Wilms et al., 2016). *n*=4 for A–C, H; *n*=5 for D–G, I–O. Scale bar, 20 µm.

isolated from chickens aged 12–17 days post-hatching (P12–P17). At this age, the chicken cochlea is mature (Runhaar et al., 1991).

We first focused on the efflux system in chicken hair cells by probing *KCNQ4*, *KCNMA1* and *KCNMB1*, encoding  $K_v7.4$  and the  $Ca^{2+}$ -activated  $K^+$  channel BK  $\alpha 1$  and  $\beta 1$  subunits, expressed in mammalian hair cells. Additionally, we included *KCNQ1* and *KCNE1*, encoding  $K_v7.1$  (also known as  $K_vLQT1$ ) and its modulatory subunit KCNE1 (also known as IsK channel). All five genes were clearly expressed in the hair cells, whereas supporting cells were unlabeled (Fig. 1A–E). As *KCNQ1* and *KCNE1* are specifically expressed in the mammalian stria vascularis, we included *KCNJ10* and *KCNJ16* as two further strial  $K^+$  channel-encoding genes. However, neither gene was expressed in the basilar papilla (Fig. 1F,G).

To probe genes involved in  $K^+$  clearance and buffering by supporting cells, the expression of *SLC12A7* and *CLC-K* was analyzed. No signal for *SLC12A7* was observed in the basilar papilla even after prolonged incubation, whereas *CLC-K* was clearly

expressed in supporting cells underneath the hair cells of the basilar papilla (Fig. 1H,I). In the mammalian stria vascularis, *CLC-K* associates with Barttin (Estévez et al., 2001). We therefore also probed the expression of *BSND*, encoding Barttin. Indeed, *BSND* was also expressed in supporting cells (Fig. 1J). We furthermore analyzed *SLC12A2*, encoding the  $Na^+/K^+/Cl^-$  co-transporter NKCC1, as we had noted its expression in the inner ear in a previous study (Wilms et al., 2016). The probe clearly labeled supporting cells (Fig. 1K).

Finally, we studied four genes, encoding  $Na^+/K^+$ -ATPase subunits, i.e. *ATP1A1*, *ATP1A2*, *ATP1A3* and *ATP1B1*, as they might also be involved in  $K^+$  cycling and clearance in the inner ear (Schuth et al., 2014). All four genes were clearly expressed in hair cells (Fig. 1L–O). To probe whether  $Na^+/K^+$ -ATPase subunits are also present in the plasma membrane of supporting cells, we performed immunohistochemistry with an anti- $Na^+/K^+$ -ATPase antibody. We preferred this technique over RNA *in situ* hybridization because it avoided false-positive signals due to diffusion of the dye during the long incubation required to detect low-abundance gene expression. The antibody strongly labeled the base of hair cells, but immunoreactivity was also observed in the surrounding supporting cells (Fig. 2).

In sum, our data reveal similarities but also striking differences in  $K^+$  recycling between mammals and birds. In mammals,  $K^+$  efflux from hair cells is mediated by  $K_v7.4$  and the BK channels. Both are present in avian hair cells, but we observed a third efflux apparatus, consisting of the  $K_v7.1$  and KCNE1 channel proteins. These two proteins mediate  $K^+$  secretion into the endolymph in the mammalian stria vascularis (Sakagami et al., 1991) and the tegmentum vasculosum (Wilms et al., 2016). The reason for their recruitment is currently unknown as the driving force of  $K^+$  into avian hair cells is reduced compared with that in mammals, because of the lower endocochlear potential in birds. Consequently, the intracellular accumulation of  $K^+$  in avian hair cells should be less. Intriguingly, we noted expression of all four tested  $Na^+/K^+$ -ATPase subunits in the avian hair cells. The inwardly directed  $K^+$  transport of this pump counteracts the efflux of this ion. This might contribute to the necessity for an additional  $K^+$  efflux system in the basilar papilla. In contrast, the pump is only weakly expressed in the mammalian organ of Corti. The rat cochlea weakly expresses  $\alpha 2$  in outer hair cells and  $\alpha 1$  in pillar cells (ten Cate et al., 1994), and does not express  $\alpha 3$ ,  $\beta 1$  or  $\beta 2$ . Similarly, mice showed weak expression of  $\alpha 1$  in the organ of Corti, whereas  $\alpha 2$ ,  $\alpha 3$ ,  $\beta 1$  and  $\beta 2$  were absent (Erichsen et al., 1996). The absence of the ATP-driven pump in mammalian hair cells is thought to reflect the need to avoid metabolic energy. A high metabolism would likely require vascularization close to hair cells, changing cochlea micromechanics. Furthermore, blood flow-associated vibrations may add noise to the system (Zdebek et al., 2009). Especially during loud sound stimulation, the absence of an ATP pump might also prevent hyperpolarization, which could produce an effect analogous to photoreceptor adaptation.

Of note, hair cells in the rat vestibular system express  $\alpha 1$  (Schuth et al., 2014) and hair cells of the fish inner ear are also positive for  $Na^+/K^+$ -ATPase (Clemens Grisham et al., 2013), indicating an ancient requirement for the  $Na^+/K^+$ -ATPase in hair cells.

Efflux of  $K^+$  from hair cells must be accompanied by rapid ion removal from the extracellular space in order not to continuously depolarize hair cells. Our data demonstrate striking differences between mammals and birds. In chickens, supporting cells express NKCC1, Barttin and *CLC-K*, and the  $Na^+/K^+$ -ATPase. NKCC1 transports 1  $Na^+$ , 1  $K^+$  and 2  $Cl^-$  per cycle (Gamba et al., 1994) and exhibits important features required for an efficient  $K^+$  buffer. The

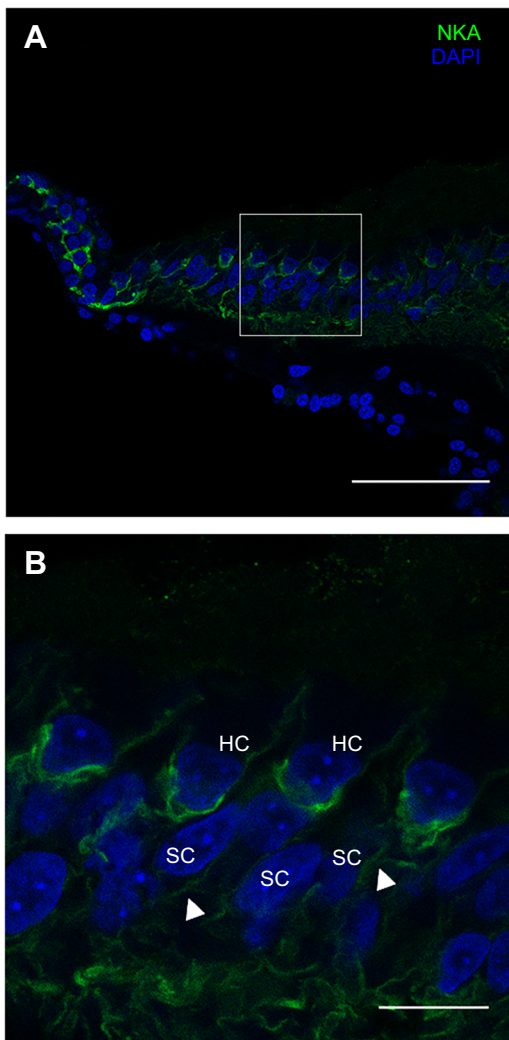

**Fig. 2. Immunohistochemical analysis of  $Na^+/K^+$ -ATPase subunits.** Cochlear cross-sections were labeled with an anti- $Na^+/K^+$ -ATPase antibody (NKA). Strong immunoreactivity was observed at the base of hair cells, consistent with the strong RNA *in situ* hybridization signals. Additionally, immunoreactivity was detected in the membrane of supporting cells (arrowheads). The boxed region in A is shown at greater magnification in B.  $n=4$ . Scale bar: A, 50  $\mu m$ ; B, 10  $\mu m$ . HC, hair cell; SC, supporting cell.

transporter experiences a strong net inwardly directed driving force and has a high affinity for external  $K^+$  (Payne et al., 1995), making it a very potent apparatus to remove  $K^+$  from the surroundings of hair

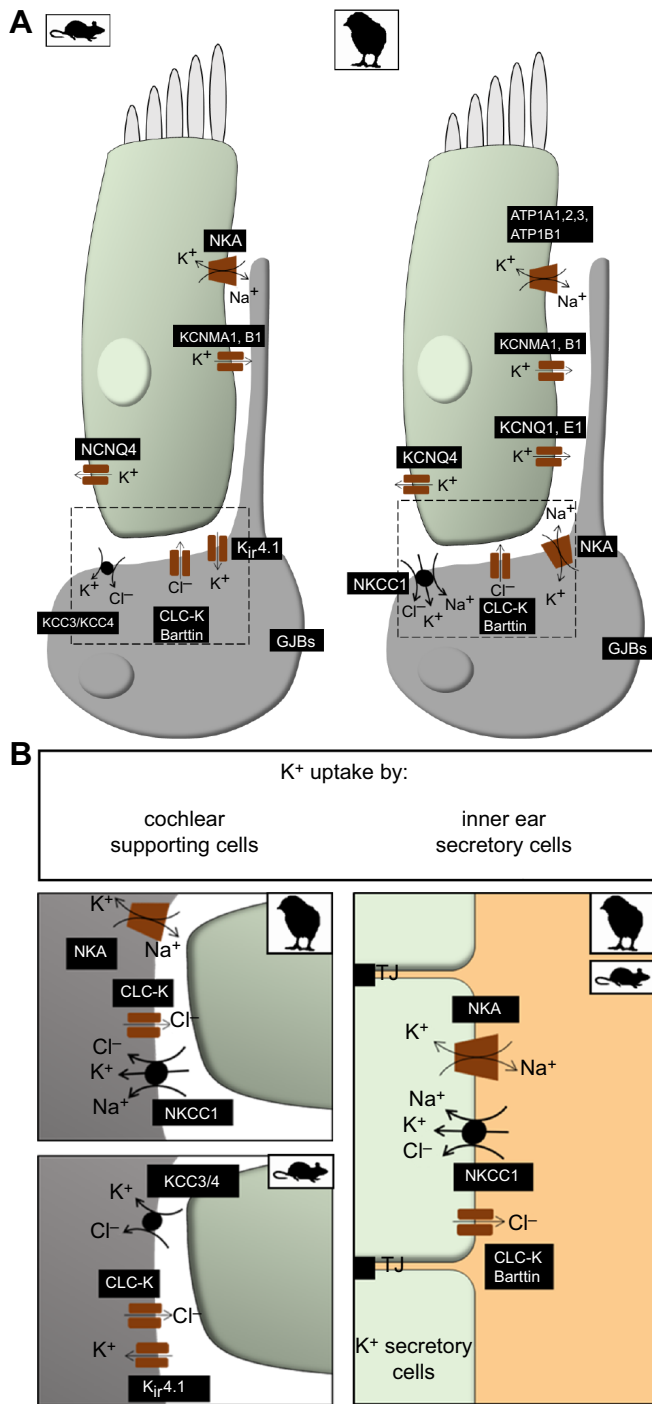

**Fig. 3. Schematic model of the molecular repertoire in hair cells, supporting cells and dark cells of mouse and chicken.** (A) Proteins responsible for  $K^+$  efflux from the mammalian hair cells are also present in chicken hair cells. The latter additionally contain KCNQ1 and KCNE1. (B) In contrast, the  $K^+$  uptake molecules in chicken supporting cells strongly differ from those in corresponding mammalian cells by the presence of NKCC1 instead of KCC3 and KCC4. The molecular repertoire of avian supporting cells thus resembles the  $K^+$  uptake mechanism of inner ear secretory cells, i.e. the endolymph-producing dark cells in the vestibular system of both chicken and mouse and the mammalian marginal cells in the stria vascularis.

cells. Additional  $K^+$  might be removed via  $Na^+/K^+$ -ATPases, which will also accumulate extracellular  $Na^+$  for driving NKCC1. The co-transported  $Cl^-$  can then be effluxed by the  $Cl^-$  channel formed by CLC-K and Barttin. This is reminiscent of inner ear secretory cells, i.e. marginal cells of the stria vascularis and vestibular dark cells, which operate with an identical system for  $K^+$  uptake (Hibino and Kurachi, 2006; Wangemann, 2006) (Fig. 3). Thus,  $K^+$  clearance in supporting cells is based on a system that has already been shown to be well suited for  $K^+$  uptake in secretory epithelia in the inner ear (Hibino and Kurachi, 2006; Wangemann, 2006; Zdebik et al., 2009) (Fig. 3). In contrast, the logic of the mammalian clearance system is less evident. Mice lacking KCC3 or KCC4 are deaf (Boettger et al., 2002, 2003). The expression of the two transporters in supporting cells strongly suggests their involvement in  $K^+$  clearance and recycling (Fig. 3). However, their precise role is still debated (Wangemann, 2006; Zdebik et al., 2009; Lang et al., 2007), as the direction and magnitude of net  $K^+/Cl^-$  co-transport by these two electroneutral transporters will be dictated by the sum of the  $K^+$  and  $Cl^-$  chemical potential differences. Both  $K^+/Cl^-$  transporters usually operate in an outwardly directed transport mode (Gamba, 2005) and reversal of transport direction would require a low intracellular  $Cl^-$  concentration (Payne, 1997). This has not been demonstrated so far in supporting cells. A shared feature of the avian and mammalian supporting cells is the presence of CLC-K (chicken: this study; mammals: Qu et al., 2006). We demonstrated in addition the expression of *BSND*, encoding the accessory subunit barttin. This gene, however, has not been analyzed in the mature mammalian cochlea so far. Independent of the precise mode of operation of  $K^+$  clearance in the mammalian cochlea, the different expression patterns of *SLC12* members between mammals and birds reveal the evolution of different molecular underpinnings in  $K^+$  clearance across vertebrate inner ears.

In conclusion, the variable degree of shared and distinct molecular underpinnings across different features of the vertebrate auditory system will provide ample possibilities to study evolutionary processes and constraints therein, making the auditory system a rewarding research area in this field.

#### Acknowledgements

We thank Christine Köppl for fruitful discussions.

#### Competing interests

The authors declare no competing or financial interests.

#### Author contributions

Conceptualization: H.G.N.; Investigation: V.W., C.S.; Resources: H.G.N.; Writing - original draft: H.G.N.; Writing - review & editing: V.W.; Supervision: H.G.N.; Project administration: H.G.N.; Funding acquisition: H.G.N.

#### Funding

This work was supported by the Deutsche Forschungsgemeinschaft [grant number 428/18-1]. The funding organization had no influence on the design of the study and collection, analysis and interpretation of data and in writing the manuscript.

#### Supplementary information

Supplementary information available online at <http://jeb.biologists.org/lookup/doi/10.1242/jeb.158030.supplemental>

#### References

- Boettger, T., Hübner, C. A., Maier, H., Rust, M. B., Beck, F. X. and Jentsch, T. J. (2002). Deafness and renal tubular acidosis in mice lacking the K-Cl co-transporter *Kcc4*. *Nature* **416**, 874-878.
- Boettger, T., Rust, M. B., Maier, H., Seidenbecher, T., Schweizer, M., Keating, D. J., Faulhaber, J., Ehmke, H., Pfeffer, C., Scheel, O. et al. (2003). Loss of K-Cl co-transporter KCC3 causes deafness, neurodegeneration and reduced seizure threshold. *EMBO J.* **22**, 5422-5434.

- Chomczynski, P. Sacchi, N.** (1987). Single-step method of RNA isolation by acid guanidinium thiocyanate-phenol-chloroform extraction. *Anal. Biochem.* **162**, 156-159.
- Clemens Grisham, R., Kindt, K., Finger-Baier, K., Schmid, B. and Nicolson, T.** (2013). Mutations in ap1b1 cause mistargeting of the Na(+)/K(+)-ATPase pump in sensory hair cells. *PLoS ONE* **8**, e60866.
- Ehmann, H., Hartwich, H., Salzig, C., Hartmann, N., Clément-Ziza, M., Ushakov, K., Avraham, K. B., Bininda-Emonds, O. R. P., Hartmann, A. K., Lang, P. et al.** (2013). Time-dependent gene expression analysis of the developing superior olivary complex. *J. Biol. Chem.* **288**, 25865-25879.
- Erichsen, S., Zuo, J., Curtis, L., Rarey, K. and Hultcrantz, M.** (1996). Na,K-ATPase alpha- and beta-isoforms in the developing cochlea of the mouse. *Hear. Res.* **100**, 143-149.
- Estévez, R., Boettger, T., Stein, V., Birkenhäger, R., Otto, E., Hildebrandt, F. and Jentsch, T. J.** (2001). Barttin is a Cl- channel beta-subunit crucial for renal Cl- reabsorption and inner ear K+ secretion. *Nature* **414**, 558-561.
- Gagnon, K. B. and Delpire, E.** (2013). Physiology of SLC12 transporters: lessons from inherited human genetic mutations and genetically engineered mouse knockouts. *Am. J. Physiol. Cell Physiol.* **304**, C693-C714.
- Gamba, G.** (2005). Molecular physiology and pathophysiology of electroneutral cation-chloride cotransporters. *Physiol. Rev.* **85**, 423-493.
- Gamba, G., Miyanosita, A., Lombardi, M., Lytton, J., Lee, W. S., Hediger, M. A. and Hebert, S. C.** (1994). Molecular cloning, primary structure, and characterization of two members of the mammalian electroneutral sodium-(potassium)-chloride cotransporter family expressed in kidney. *J. Biol. Chem.* **269**, 17713-17722.
- Hartmann, A.-M., Tesch, D., Nothwang, H. G. and Bininda-Emonds, O. R. P.** (2014). Evolution of the cation chloride cotransporter family: ancient origins, gene losses, and subfunctionalization through duplication. *Mol. Biol. Evol.* **31**, 434-447.
- Hibino, H. and Kurachi, Y.** (2006). Molecular and physiological bases of the K+ circulation in the mammalian inner ear. *Physiology* **21**, 336-345.
- Hibino, H., Horio, Y., Inanobe, A., Doi, K., Ito, M., Yamada, M., Gotow, T., Uchiyama, Y., Kawamura, M., Kubo, T. et al.** (1997). An ATP-dependent inwardly rectifying potassium channel, KAB-2 (Kir4. 1), in cochlear stria vascularis of inner ear: its specific subcellular localization and correlation with the formation of endocochlear potential. *J. Neurosci.* **17**, 4711-4721.
- Hibino, H., Higashi-Shingai, K., Fujita, A., Iwai, K., Ishii, M. and Kurachi, Y.** (2004). Expression of an inwardly rectifying K+ channel, Kir5.1, in specific types of fibrocytes in the cochlear lateral wall suggests its functional importance in the establishment of endocochlear potential. *Eur. J. Neurosci.* **19**, 76-84.
- Hibino, H., Nin, F., Tsuzuki, C. and Kurachi, Y.** (2010). How is the highly positive endocochlear potential formed? The specific architecture of the stria vascularis and the roles of the ion-transport apparatus. *PLoS Arch.* **459**, 521-533.
- Ishiyama, E., Cutt, R. A. and Keels, E. W.** (1970). Ultrastructure of the tegmentum vasculosum and transitional zone. *Ann. Otol. Rhinol. Laryngol.* **79**, 998-1009.
- Johnstone, C. G., Schmidt, R. S. and Johnstone, B. M.** (1963). Sodium and potassium in vertebrate cochlear endolymph as determined by flame microspectrophotometry. *Comp. Biochem. Physiol.* **9**, 335-341.
- Johnstone, B. M., Patuzzi, R., Syka, J. and Syková, E.** (1989). Stimulus-related potassium changes in the organ of Corti of guinea-pig. *J. Physiol.* **408**, 77-92.
- Kikuchi, T., Adams, J. C., Paul, D. L. and Kimura, R. S.** (1994). Gap junction systems in the rat vestibular labyrinth: immunohistochemical and ultrastructural analysis. *Acta Otolaryngol.* **114**, 520-528.
- Kikuchi, T., Kimura, R. S., Paul, D. L., Takasaka, T. and Adams, J. C.** (2000). Gap junction systems in the mammalian cochlea. *Brain Res. Brain Res. Rev.* **32**, 163-166.
- Kubisch, C., Schroeder, B. C., Friedrich, T., Lütjohann, B., El-Amraoui, A., Marlin, S., Petit, C. and Jentsch, T. J.** (1999). KCNQ4, a novel potassium channel expressed in sensory outer hair cells, is mutated in dominant deafness. *Cell* **96**, 437-446.
- Lang, F., Vallon, V., Knipper, M. and Wagemann, P.** (2007). Functional significance of channels and transporters expressed in the inner ear and kidney. *Am. J. Physiol. Cell Physiol.* **293**, C1187-C1208.
- Lautermann, J., ten Cate, W.-J. F., Altenhoff, P., Grümmer, R., Traub, O., Frank, H.-G., Jahnke, K. and Winterhager, E.** (1998). Expression of the gap-junction connexins 26 and 30 in the rat cochlea. *Cell Tissue Res.* **294**, 415-420.
- Lewis, R. S. and Hudspeth, A. J.** (1983). Voltage- and ion-dependent conductances in solitary vertebrate hair cells. *Nature* **304**, 538-541.
- Mistrik, P. and Ashmore, J.** (2009). The role of potassium recirculation in cochlear amplification. *Curr. Opin Otolaryngol. Head Neck Surg.* **17**, 394-399.
- Navaratnam, D. S., Bell, T. J., Tu, T. D., Cohen, E. L. and Oberholzer, J. C.** (1997). Differential distribution of Ca2+-activated K+ channel splice variants among hair cells along the tonotopic axis of the chick cochlea. *Neuron* **19**, 1077-1085.
- Nothwang, H. G., Kim, H. G., Aoki, J., Geisterfer, M., Kubart, S., Wegner, R. D., van Moers, A., Ashworth, L. K., Haaf, T., Bell, J. et al.** (2001). Functional hemizyosity of PAFAH1B3 due to a PAFAH1B3-CLK2 fusion gene in a female with mental retardation, ataxia and atrophy of the brain. *Hum. Mol. Genet.* **10**, 797-806.
- Pawlik, B., Schluter, T., Hartwich, H., Breuel, S., Heepmann, L. and Nothwang, H. G.** (2016). Comparative analysis of gene regulatory network components in the auditory hindbrain of mice and chicken. *Brain Behav. Evol.* **88**, 161-176.
- Payne, J. A.** (1997). Functional characterization of the neuronal-specific K-Cl cotransporter: implications for [K+]o regulation. *Am. J. Physiol.* **273**, C1516-C1525.
- Payne, J. A., Xu, J.-C., Haas, M., Lytle, C. Y., Ward, D. and Forbush, B.III.** (1995). Primary structure, functional expression, and chromosomal localization of the bumetanide-sensitive Na-K-Cl cotransporter in human colon. *J. Biol. Chem.* **270**, 17977-17985.
- Poje, C. P., Sewell, D. A. and Saunders, J. C.** (1995). The effects of exposure to intense sound on the DC endocochlear potential in the chick. *Hear. Res.* **82**, 197-204.
- Qu, C., Liang, F., Hu, W., Shen, Z., Spicer, S. S. and Schulte, B. A.** (2006). Expression of CLC-K chloride channels in the rat cochlea. *Hear. Res.* **213**, 79-87.
- Rosenblatt, K. P., Sun, Z.-P., Heller, S. and Hudspeth, A. J.** (1997). Distribution of Ca2+-activated K+ channel isoforms along the tonotopic gradient of the chicken's cochlea. *Neuron* **19**, 1061-1075.
- Runhaar, G., Schedler, J. and Manley, G. A.** (1991). The potassium concentration in the cochlear fluids of the embryonic and post-hatching chick. *Hear. Res.* **56**, 227-238.
- Sakagami, M., Fukazawa, K., Matsunaga, T., Fujita, H., Mori, N., Takumi, T., Ohkubo, H. and Nakanishi, S.** (1991). Cellular localization of rat Isk protein in the stria vascularis by immunohistochemical observation. *Hear. Res.* **56**, 168-172.
- Schmidt, R. S.** (1963). Types of endolymphatic potentials. *Comp. Med.* **10**, 83-87.
- Schmidt, R. S. and Fernandez, C.** (1962). Labyrinthine DC potentials in representative vertebrates. *Comp. Biochem. Physiol.* **59**, 311-322.
- Schuth, O., McLean, W. J., Eatock, R. A. and Pyott, S. J.** (2014). Distribution of Na,K-ATPase alpha subunits in rat vestibular sensory epithelia. *JARO* **15**, 739-754.
- Steel, K. P., Barkway, C. and Bock, G. R.** (1987). Strial dysfunction in mice with cochleo-saccular abnormalities. *Hear. Res.* **27**, 11-26.
- ten Cate, W.-J. F., Curtis, L. M. and Rarey, K. E.** (1994). Na,K-ATPase alpha and beta subunit isoform distribution in the rat cochlear and vestibular tissues. *Hear. Res.* **75**, 151-160.
- Wagemann, P.** (2002). K(+) cycling and its regulation in the cochlea and the vestibular labyrinth. *Audiol. Neurootol.* **7**, 199-205.
- Wagemann, P.** (2006). Supporting sensory transduction: cochlear fluid homeostasis and the endocochlear potential. *J. Physiol.* **576**, 11-21.
- Wilms, V., Köppl, C., Söffgen, C., Hartmann, A.-M. and Nothwang, H. G.** (2016). Molecular bases of K+ secretory cells in the inner ear. Shared and distinct features between birds and mammals. *Sci. Rep.* **6**, 34203.
- Zdebik, A. A., Wagemann, P. and Jentsch, T. J.** (2009). Potassium ion movement in the inner ear: insights from genetic disease and mouse models. *Physiology* **24**, 307-316.
- Zidanic, M. and Brownell, W. E.** (1990). Fine structure of the intracochlear potential field. I. The silent current. *Biophys. J.* **57**, 1253-1268.
